# Supplementary material for: Nitrifier denitrification potentially dominates N 2 O production in a sandy soil – results from different fertilization and irigation regimes in potato cropping in Germany
Source: Copernicus journal article supplement (doi:10.5194/egusphere-2023-2277), 2023-10-16
Supplement: Supplementary file 1 [file egusphere-2023-2277-supplement.pdf]

*Supplement of*

**Nitrifier denitrification potentially dominates N<sub>2</sub>O production in a sandy soil – results from different fertilization and irrigation regimes in potato cropping in Germany**

5 Storch et al.

*Correspondence to:* Laura Charlotte Storch (l.storch@posteo.de)

**Table S1: Overview of water and nitrogen (N) fertilizer application with indication of the date and amount for the investigated treatments ZI-ZN (zero irrigation without (zero) N application), ZI-N (zero irrigation with N application), SI-ZN (sprinkler irrigation without (zero) N application), SI-N (sprinkler irrigation with N application), DI-ZN (drip irrigation without (zero) N application), DI-N (drip irrigation with N application), F (fertigation) and F-ZC (fertigation without (zero) crops). Marked in bold are sampling dates for functional genes analysis.**

| Sampling date                               | <b>26.05.20</b> | 09.06.20 | 16.06.20 | 23.06.20 | <b>30.06.20</b> | 07.07.20 | <b>14.07.20</b> | 21.07.20 | 28.07.20 |          | 04.08.20 |          | 11.08.20 |          |
|---------------------------------------------|-----------------|----------|----------|----------|-----------------|----------|-----------------|----------|----------|----------|----------|----------|----------|----------|
| Air temperature [°C]                        | 19.0            | 21.1     | 25.8     | 24.7     | 21.2            | 17.9     | 28.2            | 22.0     | 26,7     |          | 24.3     |          | 31.0     |          |
| Soil temperature [°C]                       | 12.6            | 17.3     | 19.0     | 17.9     | 16.2            | 15.4     | 17.3            | 17.5     | 19,7     |          | 17.1     |          | 23.1     |          |
| Precipitation [mm]                          | 16.3            | 0.1      | 12.5     | 2.3      | 11.2            | 3.0      | 0.0             | 0.1      | 4,2      |          | 3.1      |          | 0.7      |          |
| Application date                            |                 | 09.06.20 | 18.06.20 | 24.06.20 | 01.07.20        | 07.07.20 | 14.07.20        | 21.07.20 | 23.07.20 | 30.07.20 | 03.08.20 | 04.08.20 | 07.08.20 | 12.08.20 |
| Water supply<br>[L m <sup>-2</sup> ]        | ZI-ZN           | 0        | 0        | 0        | 0               | 0        | 0               | 0        | 0        | 0        | 0        | 0        | 0        | 0        |
|                                             | SI-ZN           | 0        | 10       | 0        | 15              | 0        | 0               | 0        | 10       | 15       | 15       | 15       | 0        | 15       |
|                                             | DI-ZN           | 0        | 3.11     | 0        | 4.66            | 0        | 0               | 0        | 3.11     | 4.66     | 4.66     | 4.66     | 0        | 4.66     |
|                                             | ZI-N            | 0        | 0        | 0        | 0               | 0        | 0               | 0        | 0        | 0        | 0        | 0        | 0        | 0        |
|                                             | SI-N            | 0        | 10       | 0        | 15              | 0        | 0               | 0        | 10       | 15       | 15       | 15       | 0        | 15       |
|                                             | DI-N            | 0        | 3.11     | 0        | 4.66            | 0        | 0               | 0        | 3.11     | 4.66     | 4.66     | 4.66     | 0        | 4.66     |
|                                             | F               | 0        | 3.11     | 3.11     | 4.66            | 3.11     | 3.11            | 3.11     | 3.11     | 4.66     | 4.66     | 0        | 4.66     | 4.66     |
|                                             | F-ZC            | 0        | 3.11     | 3.11     | 4.66            | 3.11     | 3.11            | 3.11     | 3.11     | 4.66     | 4.66     | 0        | 4.66     | 4.66     |
| Nitrogen supply<br>[kg N ha <sup>-1</sup> ] | ZI-ZN           | 0        | 0        | 0        | 0               | 0        | 0               | 0        | 0        | 0        | 0        | 0        | 0        | 0        |
|                                             | SI-ZN           | 0        | 0        | 0        | 0               | 0        | 0               | 0        | 0        | 0        | 0        | 0        | 0        | 0        |
|                                             | DI-ZN           | 0        | 0        | 0        | 0               | 0        | 0               | 0        | 0        | 0        | 0        | 0        | 0        | 0        |
|                                             | ZI-N            | 0        | 75       | 0        | 0               | 0        | 45.33           | 0        | 0        | 0        | 0        | 0        | 30       | 0        |
|                                             | SI-N            | 0        | 75       | 0        | 0               | 0        | 45.33           | 0        | 0        | 0        | 0        | 0        | 30       | 0        |
|                                             | DI-N            | 0        | 75       | 0        | 0               | 0        | 45.33           | 0        | 0        | 0        | 0        | 0        | 30       | 0        |
|                                             | F               | 0        | 7.75     | 7.75     | 11.63           | 15.5     | 15.5            | 15.5     | 15.5     | 0        | 15.5     | 0        | 15.5     | 0        |
|                                             | F-ZC            | 0        | 7.75     | 7.75     | 11.63           | 15.5     | 15.5            | 15.5     | 15.5     | 0        | 15.5     | 0        | 15.5     | 0        |

**Table S1: continued.**

| Sampling date                               | 18.08.20 | <b>25.08.20</b> | 01.09.20 | 08.09.20 | <b>15.09.20</b> |
|---------------------------------------------|----------|-----------------|----------|----------|-----------------|
| Air temperature [°C]                        | 21.9     | 19.7            | 21.4     | 21.7     | 27.8            |
| Soil temperature [°C]                       | 23.2     | 18.5            | 14.4     | 14.5     | 18,0            |
| Precipitation [mm]                          | 0.1      | 5.1             | 17.1     | 3.5      | 0.0             |
| Application date                            | 19.08.20 | 27.08.20        | 03.09.20 | 09.09.20 | harvest         |
| Water supply<br>[L m <sup>-2</sup> ]        | ZI-ZN    | 0               | 0        | 0        | 0               |
|                                             | SI-ZN    | 10              | 0        | 0        | 0               |
|                                             | DI-ZN    | 3.11            | 0        | 0        | 0               |
|                                             | ZI-N     | 0               | 0        | 0        | 0               |
|                                             | DI-N     | 3.11            | 0        | 0        | 0               |
|                                             | SI-N     | 10              | 0        | 0        | 0               |
|                                             | F        | 3.11            | 3.11     | 3.11     | 3.11            |
|                                             | F-ZC     | 3.11            | 3.11     | 3.11     | 3.11            |
| Nitrogen supply<br>[kg N ha <sup>-1</sup> ] | ZI-ZN    | 0               | 0        | 0        | 0               |
|                                             | SI-ZN    | 0               | 0        | 0        | 0               |
|                                             | DI-ZN    | 0               | 0        | 0        | 0               |
|                                             | ZI-N     | 0               | 0        | 0        | 0               |
|                                             | SI-N     | 0               | 0        | 0        | 0               |
|                                             | DI-N     | 0               | 0        | 0        | 0               |
|                                             | F        | 7.75            | 3.88     | 3.88     | 3.88            |
|                                             | F-ZC     | 7.75            | 3.88     | 3.88     | 3.88            |

**Table S2: Seasonal N<sub>2</sub>O flux rates in  $\mu\text{g N}_2\text{O-N m}^{-2} \text{h}^{-1}$  given as median value of three field replicates. Factor of change in N<sub>2</sub>O flux rates for the investigated treatment each compared to the untreated reference treatment zero irrigation without (zero) ZI-ZN. Abbreviations: ZI-N (zero irrigation with N application), SI-ZN (sprinkler irrigation without (zero) N application), SI-N (sprinkler irrigation with N application), DI-ZN (drip irrigation without (zero) N application), DI-N (drip irrigation with N application), F (fertigation) and F-ZC (fertigation without (zero) crops). Marked in bold are sampling dates for functional genes analysis.**

| Sampling date    | Seasonal N <sub>2</sub> O flux rates per treatment |       |       |      |      |      |      |       |
|------------------|----------------------------------------------------|-------|-------|------|------|------|------|-------|
|                  | ZI-ZN                                              | SI-ZN | DI-ZN | ZI-N | SI-N | DI-N | F    | F-ZC  |
| <b>26.05.20</b>  | 5.0                                                | 27.4  | 8.2   | 21.8 | 22.8 | 13.8 | 28.9 | 18.2  |
| 09.06.20         | 34.5                                               | 54.7  | 14.3  | 6.1  | 37.3 | 74.5 | 32.2 | -11.0 |
| 16.06.20         | 25.6                                               | 40.0  | 30.7  | 38.1 | 28.0 | 43.3 | 34.8 | -1.9  |
| 23.06.20         | 11.8                                               | 26.6  | 16.5  | 9.9  | 26.5 | 19.3 | 6.4  | 2.2   |
| <b>30.06.20</b>  | 5.3                                                | 24.2  | 21.1  | 42.6 | 47.9 | 46.0 | 75.1 | 28.8  |
| 07.07.20         | -9.7                                               | 9.2   | -10.8 | 19.1 | 50.6 | 71.7 | 13.9 | -1.3  |
| <b>14.07.20</b>  | 22.8                                               | 32.8  | 8.7   | 11.5 | 52.1 | 80.4 | 34.7 | 43.0  |
| 21.07.20         | -17.8                                              | 35.3  | -8.1  | 50.2 | 12.5 | 9.7  | 28.4 | 17.7  |
| 28.07.20         | -0.8                                               | 14.3  | 9.5   | 43.0 | 13.3 | 13.6 | 22.6 | 17.5  |
| 04.08.20         | 8.2                                                | 24.3  | 26.6  | 9.9  | 17.9 | 20.9 | 46.4 | 14.2  |
| 11.08.20         | -5.5                                               | 23.3  | 18.1  | 14.8 | 27.7 | 13.8 | 7.8  | 12.9  |
| 18.08.20         | -1.2                                               | 20.3  | -2.9  | 10.7 | 19.3 | 19.5 | 12.1 | 0.7   |
| <b>25.08.20</b>  | 6.5                                                | 3.3   | 30.1  | 14.2 | 3.8  | 5.8  | 9.4  | 4.5   |
| 01.09.20         | 24.8                                               | 12.5  | 10.3  | -9.2 | 14.3 | 12.1 | 15.4 | -5.4  |
| 08.09.20         | 15.6                                               | 9.1   | -3.9  | 28.3 | 7.9  | 12.8 | 1.8  | 9.1   |
| <b>15.09.20</b>  | 21.7                                               | -1.6  | -1.7  | 3.0  | 4.1  | 10.3 | 2.1  | 4.0   |
| Seasonal median  | 7.3                                                | 23.7  | 9.9   | 14.5 | 21.1 | 16.5 | 19.0 | 6.8   |
| Factor of change |                                                    | 3.2   | 1.4   | 2.0  | 2.9  | 2.3  | 2.6  | 0.9   |

**Table S3: (a) Modell parameter (chi square and  $p$  values) of linear mixed effects models with ‘N<sub>2</sub>O flux’ as response variable and ‘week’ as explanatory variables. A separate model was fitted for each treatment: ZI-ZN (zero irrigation without (zero) nitrogen (N) fertilizer), SI-ZN (sprinkler irrigation without (zero) nitrogen (N) fertilizer), and DI-ZN (drip irrigation without (zero) nitrogen (N) fertilizer). (b) Seasonal development of N<sub>2</sub>O fluxes during the growing season for the three different treatments: ZI-ZN, SI-ZN, and DI-ZN shown are the median values per treatment and sampling date. Differences in lowercase letters (Group) indicate significant differences between sampling weeks (ANOVA followed by Tukey post-hoc-test). (c) Seasonal median values for each treatment with corresponding factor of change compared to reference treatment (ZI-ZN). Values with \*, \*\*, \*\*\* indicate significance at  $p < 0.05, 0.01, 0.001$ .**

| Treatment |                  | ZI-ZN                        |                    | SI-ZN                       |                  | DI-ZN                        |                         |
|-----------|------------------|------------------------------|--------------------|-----------------------------|------------------|------------------------------|-------------------------|
| (a)       | ANOVA            | <i>chi square:</i><br>23.946 | <i>p:</i> 0.0060** | <i>chi square:</i><br>11.87 | <i>p:</i> 0.6884 | <i>chi square:</i><br>32.164 | <i>p:</i><br><0.0061*** |
| (b)       | Sampling date    | Median                       | Group              | Median                      | Group            | Median                       | Group                   |
|           | 26.05.20         | 5.02                         | ab                 | 27.10                       | a                | 8.21                         | a                       |
|           | 09.06.20         | 34.53                        | b                  | 54.66                       | a                | 14.32                        | a                       |
|           | 16.06.20         | 25.60                        | ab                 | 39.97                       | a                | 30.69                        | a                       |
|           | 23.06.20         | 1178                         | ab                 | 26.63                       | a                | 16.54                        | a                       |
|           | 30.06.20         | 5.34                         | ab                 | 24.24                       | a                | 21.10                        | a                       |
|           | 07.07.20         | -9.74                        | ab                 | 9.16                        | a                | -10.77                       | a                       |
|           | 14.07.20         | 22.75                        | ab                 | 32.80                       | a                | 8.70                         | a                       |
|           | 21.07.20         | -17.78                       | a                  | 35.26                       | a                | -8.09                        | a                       |
|           | 28.07.20         | -0.82                        | ab                 | 14.30                       | a                | 9.54                         | a                       |
|           | 04.08.20         | 8.16                         | ab                 | 24.32                       | a                | 26.59                        | a                       |
|           | 11.08.20         | -5.45                        | ab                 | 23.25                       | a                | 18.06                        | a                       |
|           | 18.08.20         | -1.25                        | ab                 | 20.26                       | a                | -2.91                        | a                       |
|           | 25.08.20         | 6.48                         | ab                 | 3.26                        | a                | 30.08                        | a                       |
|           | 01.09.20         | 24.83                        | ab                 | 12.54                       | a                | 10.34                        | a                       |
|           | 08.09.20         | 15.60                        | ab                 | 9.15                        | a                | -3.91                        | a                       |
|           | 15.09.20         | 21.74                        | ab                 | -1.64                       | a                | -1.66                        | a                       |
| (c)       | Seasonal median  | 7.3                          |                    | 23.7                        |                  | 9.9                          |                         |
|           | Factor of change |                              |                    | 3.2                         |                  | 1.4                          |                         |

**Table S3: (a) Modell parameter (chi square and  $p$  values) of linear mixed effects models with ‘N<sub>2</sub>O flux’ as response variable and ‘week’ as explanatory variables. A separate model was fitted for each treatment: ZI-N (zero irrigation with nitrogen (N) fertilizer), SI-N (sprinkler irrigation with N fertilizer), DI-N (drip irrigation with N fertilizer), F (fertigation and FZ-C (fertigation without (zero) crops). (b) Seasonal development of N<sub>2</sub>O fluxes during the growing season for the three different treatments: ZI-N, SI-N, DI-N, F and FZC shown are the median values per treatment and sampling date. Differences in lowercase letters (Group) indicate significant differences between sampling weeks (ANOVA followed by Tukey post-hoc-test). (c) Seasonal median values for each treatment with corresponding factor of change compared to reference treatment (ZI-ZN). Values with \*, \*\*, \*\*\* indicate significance at  $p < 0.05, 0.01, 0.001$ .**

| Treatment |                  | ZI-N                         |               | SI-N                         |                  | DI-N                         |             | F                            |             | F-ZC                         |             |
|-----------|------------------|------------------------------|---------------|------------------------------|------------------|------------------------------|-------------|------------------------------|-------------|------------------------------|-------------|
| (a)       | ANOVA            | <i>chi square:</i><br>23.427 | $p: 0.0445^*$ | <i>chi square:</i><br>42.624 | $p: 0.0018^{**}$ | <i>chi square:</i><br>24.584 | $p: 0.0558$ | <i>chi square:</i><br>19.965 | $p: 0.1733$ | <i>chi square:</i><br>10.876 | $p: 0.7613$ |
| (b)       | Sampling date    | Median                       | Group         | Median                       | Group            | Median                       | Group       | Median                       | Group       | Median                       | Group       |
|           | 26.05.20         | 21.83                        | a             | 22.82                        | abc              | 13.78                        | a           | 28.93                        | a           | 18.18                        | a           |
|           | 09.06.20         | 6.07                         | a             | 37.28                        | abc              | 74.49                        | a           | 32.21                        | a           | -10.98                       | a           |
|           | 16.06.20         | 38.13                        | a             | 28.00                        | abc              | 43.33                        | a           | 34.84                        | a           | -1.92                        | a           |
|           | 23.06.20         | 9.88                         | a             | 26.52                        | abc              | 19.29                        | a           | 6.45                         | a           | 2.15                         | a           |
|           | 30.06.20         | 42.62                        | a             | 47.87                        | bc               | 45.97                        | a           | 75.12                        | a           | 28.76                        | a           |
|           | 07.07.20         | 19.10                        | a             | 50.65                        | bc               | 71.65                        | a           | 13.93                        | a           | -1.32                        | a           |
|           | 14.07.20         | 11.53                        | a             | 52.05                        | bc               | 80.40                        | a           | 34.71                        | a           | 42.98                        | a           |
|           | 21.07.20         | 50.23                        | a             | 12.53                        | a                | 9.68                         | a           | 28.40                        | a           | 17.74                        | a           |
|           | 28.07.20         | 43.03                        | a             | 13.30                        | abc              | 13.60                        | a           | 22.60                        | a           | 17.49                        | a           |
|           | 04.08.20         | 9.88                         | a             | 17.91                        | abc              | 20.89                        | a           | 46.38                        | a           | 14.22                        | a           |
|           | 11.08.20         | 14.80                        | a             | 27.74                        | abc              | 13.78                        | a           | 7.80                         | a           | 12.91                        | a           |
|           | 18.08.20         | 10.67                        | a             | 19.30                        | abc              | 19.49                        | a           | 12.08                        | a           | 0.73                         | a           |
|           | 25.08.20         | 14.21                        | a             | 3.77                         | ab               | 5.79                         | a           | 9.41                         | a           | 4.49                         | a           |
|           | 01.09.20         | -9.20                        | a             | 14.33                        | abc              | 12.10                        | a           | 15.36                        | a           | -5.37                        | a           |
|           | 08.09.20         | 28.29                        | a             | 7.90                         | abc              | 12.83                        | a           | 1.79                         | a           | 9.13                         | a           |
|           | 15.09.20         | 3.03                         | a             | 4.08                         | abc              | 10.28                        | a           | 2.07                         | a           | 3.96                         | a           |
| (c)       | Seasonal median  | 14.5                         |               | 21.1                         |                  | 16.5                         |             | 19.0                         |             | 6.8                          |             |
|           | Factor of change | 2.0                          |               | 2.9                          |                  | 2.3                          |             | 2.6                          |             | 0.6                          |             |

**Table S4: Median values of the gene copy numbers per gram soil of the nitrogen cycle for the investigated treatments ZI-ZN (zero irrigation without (zero) N application), ZI-N (zero irrigation with N application), SI-ZN (sprinkler irrigation without (zero) N application), SI-N (sprinkler irrigation with N application), DI-ZN (drip irrigation without (zero) N application), DI-N (drip irrigation with N application), F (fertigation) and F-ZC (fertigation without (zero) crops) of the ridge (0-10cm). Modell parameter (*F* and *p* values) of generalized mixed effects models with 'gene copy numbers' as response variable and 'week' as explanatory variables. A separate model was fitted for each treatment. Differences in lowercase letters indicate significant differences between sampling weeks (ANOVAs followed by Tukey post-hoc tests, *p* < 0.05) under consideration that sampling dates were uneven in time space. *amoA* = gene encoding ammonium monoxygenase, *nxrB* = gene encoding nitrite oxidoreductase, *narG* = gene encoding nitrate reductase, *nirK/nirS* = gene encoding nitrite reductase and *nosZ* = encoding nitrous oxide (N<sub>2</sub>O) reductase.**

| Sampling date*     | 26.05.20                 | 30.06.20                 | 14.07.20                 | 25.08.20                | 15.09.20                 | ANOVA  |          |
|--------------------|--------------------------|--------------------------|--------------------------|-------------------------|--------------------------|--------|----------|
|                    |                          |                          |                          |                         |                          | F      | <i>p</i> |
| <b><i>amoA</i></b> |                          |                          |                          |                         |                          |        |          |
| ZI-ZN              | 9.67 x10 <sup>4</sup>    | 2.34 x10 <sup>4</sup>    | 3.50 x10 <sup>4</sup>    | 6.29 x10 <sup>4</sup>   | 4.40 x10 <sup>4</sup>    | 6.798  | 0.0065   |
| SI-ZN              | 1.30x10 <sup>5</sup> b   | 3.20 x10 <sup>4</sup> a  | 5.21x10 <sup>4</sup> a   | 5.52 x10 <sup>4</sup> a | 4.39x10 <sup>4</sup> a   | 27.841 | <0.05    |
| DI-ZN              | 4.03 x10 <sup>4</sup>    | 3.41 x10 <sup>4</sup>    | 6.77 x10 <sup>4</sup>    | 2.93 x10 <sup>4</sup>   | 2.86 x10 <sup>4</sup>    | 3.327  | 0.056    |
| ZI-N               | 6.32 x10 <sup>4</sup> ab | 3.36x10 <sup>4</sup> a   | 7.45x10 <sup>4</sup> b   | 5.55x10 <sup>4</sup> ab | 3.48x10 <sup>4</sup> ab  | 4.381  | <0.05    |
| SI-N               | 4.42 x10 <sup>4</sup> a  | 3.37x10 <sup>4</sup> a   | 8.24x10 <sup>4</sup> b   | 4.21x10 <sup>4</sup> ab | 3.94x10 <sup>4</sup> a   | 5.576  | <0.05    |
| DI-N               | 4.02 x10 <sup>4</sup> ab | 2.87x10 <sup>4</sup> ab  | 1.05x10 <sup>4</sup> b   | 3.02x10 <sup>4</sup> a  | 3.11x10 <sup>4</sup> ab  | 9.842  | <0.05    |
| F                  | 1.66x10 <sup>5</sup> b   | 3.26 x10 <sup>4</sup> ab | 6.03x10 <sup>4</sup> ab  | 4.96 x10 <sup>4</sup> a | 5.61x10 <sup>4</sup> a   | 32.316 | <0.05    |
| F-ZC               | 1.00x10 <sup>5</sup> b   | 2.34 x10 <sup>4</sup> a  | 4.51 x10 <sup>4</sup> a  | 5.21 x10 <sup>4</sup> a | 3.20 x10 <sup>4</sup> a  | 10.187 | <0.05    |
| <b><i>nxrB</i></b> |                          |                          |                          |                         |                          |        |          |
| ZI-ZN              | 2.67 x10 <sup>5</sup>    | 3.64 x10 <sup>5</sup>    | 3.13 x10 <sup>5</sup> a  | 2.79 x10 <sup>5</sup>   | 2.15 x10 <sup>5</sup>    | 1.416  | 0.979    |
| SI-ZN              | 2.47 x10 <sup>5</sup>    | 2.92 x10 <sup>5</sup>    | 2.39 x10 <sup>5</sup>    | 3.02 x10 <sup>5</sup>   | 3.00 x10 <sup>5</sup>    | 1.561  | 0.258    |
| DI-ZN              | 2.07 x10 <sup>5</sup>    | 3.05 x10 <sup>5</sup>    | 3.34 x10 <sup>5</sup>    | 5.02 x10 <sup>5</sup>   | 3.34 x10 <sup>5</sup>    | 2.302  | 0.130    |
| ZI-N               | 2.47 x10 <sup>5</sup>    | 2.14x10 <sup>5</sup>     | 1.67 x10 <sup>5</sup>    | 2.68x10 <sup>5</sup>    | 2.95 x10 <sup>5</sup>    | 2.650  | 0.096    |
| SI-N               | 2.39 x10 <sup>5</sup> a  | 2.58x10 <sup>5</sup> ab  | 3.81 x10 <sup>5</sup> ab | 5.05x10 <sup>5</sup> b  | 4.50x10 <sup>5</sup> ab  | 3.962  | <0.05    |
| DI-N               | 2.45x10 <sup>5</sup>     | 3.10 x10 <sup>5</sup>    | 2.80 x10 <sup>5</sup>    | 3.92 x10 <sup>5</sup>   | 3.91 x10 <sup>5</sup>    | 1.525  | 0.387    |
| F                  | 2.94x10 <sup>5</sup>     | 3.58 x10 <sup>5</sup>    | 3.11 x10 <sup>5</sup>    | 3.68 x10 <sup>5</sup>   | 3.68 x10 <sup>5</sup>    | 2.981  | 0.073    |
| F-ZC               | 3.54x10 <sup>5</sup>     | 2.72 x10 <sup>5</sup>    | 2.80x10 <sup>5</sup>     | 2.96 x10 <sup>5</sup>   | 2.30 x10 <sup>5</sup>    | 1.012  | 0.446    |
| <b><i>narG</i></b> |                          |                          |                          |                         |                          |        |          |
| ZI-ZN              | 3.12 x10 <sup>7</sup> c  | 2.22 x10 <sup>7</sup> b  | 2.25 x10 <sup>7</sup> bc | 1.35 x10 <sup>7</sup> a | 1.16 x10 <sup>7</sup> a  | 33.486 | <0.05    |
| SI-ZN              | 2.78 x10 <sup>7</sup> a  | 2.25 x10 <sup>7</sup> c  | 1.66 x10 <sup>7</sup> b  | 1.24 x10 <sup>7</sup> a | 2.02 x10 <sup>7</sup> bc | 32.190 | <0.05    |
| DI-ZN              | 1.73 x10 <sup>7</sup> ab | 3.32 x10 <sup>7</sup> b  | 3.14 x10 <sup>7</sup> ab | 1.95 x10 <sup>7</sup> a | 1.13 x10 <sup>7</sup> a  | 12.200 | <0.05    |
| ZI-N               | 1.82 x10 <sup>7</sup> ab | 2.58 x10 <sup>7</sup> b  | 2.22 x10 <sup>7</sup> ab | 1.67 x10 <sup>7</sup> a | 1.25 x10 <sup>7</sup> a  | 5.440  | <0.05    |
| SI-N               | 1.62 x10 <sup>7</sup> a  | 2.83 x10 <sup>7</sup> b  | 3.30 x10 <sup>7</sup> b  | 1.90 x10 <sup>7</sup> a | 1.46 x10 <sup>7</sup> a  | 17.016 | <0.05    |
| DI-N               | 1.67 x10 <sup>7</sup> a  | 2.75 x10 <sup>7</sup> b  | 2.65 x10 <sup>7</sup> b  | 1.69 x10 <sup>7</sup> a | 1.43 x10 <sup>7</sup> a  | 10.928 | <0.05    |
| F                  | 3.39 x10 <sup>7</sup> d  | 2.33 x10 <sup>7</sup> c  | 2.00 x10 <sup>7</sup> b  | 1.26 x10 <sup>7</sup> a | 1.98 x10 <sup>7</sup> bc | 47.064 | <0.05    |
| F-ZC               | 3.58 x10 <sup>7</sup> b  | 1.88 x10 <sup>7</sup> a  | 1.73 x10 <sup>7</sup> a  | 1.29 x10 <sup>7</sup> a | 1.20 x10 <sup>7</sup> a  | 12.419 | <0.05    |

**Table S4: continued.**

| Sampling date      | 26.05.20                | 30.06.20                | 14.07.20                | 25.08.20                | 15.09.20                  | ANOVA   |        |
|--------------------|-------------------------|-------------------------|-------------------------|-------------------------|---------------------------|---------|--------|
|                    |                         |                         |                         |                         |                           | F       | $\rho$ |
| <b><i>nirK</i></b> |                         |                         |                         |                         |                           |         |        |
| ZI-ZN              | 2.33 x10 <sup>6</sup>   | 2.08x10 <sup>6</sup>    | 1.28x10 <sup>6</sup>    | 2.15x10 <sup>6</sup>    | 2.15x10 <sup>6</sup>      | 4.327   | 0.028  |
| SI-ZN              | 7.28 x10 <sup>5</sup> a | 2.06 x10 <sup>6</sup> c | 9.04 x10 <sup>5</sup> a | 2.28x10 <sup>6</sup> bc | 1.48x10 <sup>6</sup> ab   | 12.256  | <0.05  |
| DI-ZN              | 1.19 x10 <sup>6</sup>   | 2.09x10 <sup>6</sup>    | 1.27x10 <sup>6</sup>    | 2.05x10 <sup>6</sup>    | 1.96x10 <sup>6</sup>      | 3.753   | 0.041  |
| ZI-N               | 1.31 x10 <sup>6</sup>   | 2.04x10 <sup>5</sup>    | 6.14x10 <sup>5</sup>    | 1.16x10 <sup>6</sup>    | 2.17x10 <sup>6</sup>      | 4.327   | 0.041  |
| SI-N               | 1.29 x10 <sup>6</sup> a | 1.74 x10 <sup>6</sup> b | 1.42x10 <sup>6</sup> a  | 2.07x10 <sup>6</sup> b  | 1.59x10 <sup>6</sup> a    | 17.323  | <0.05  |
| DI-N               | 1.22x10 <sup>6</sup> ac | 2.32x10 <sup>6</sup> bd | 1.02x10 <sup>6</sup> ab | 1.92x10 <sup>6</sup> cd | 1.31x10 <sup>6</sup> abcd | 22.651  | <0.05  |
| F                  | 1.37x10 <sup>6</sup> a  | 2.01x10 <sup>6</sup> c  | 1.05x10 <sup>6</sup> a  | 2.38x10 <sup>6</sup> bc | 1.68x10 <sup>6</sup> ab   | 23.697  | <0.05  |
| F-ZC               | 1.65x10 <sup>6</sup> ab | 1.94x10 <sup>6</sup> b  | 7.94x10 <sup>5</sup> a  | 2.18x10 <sup>6</sup> b  | 1.06x10 <sup>6</sup> ab   | 5.822   | <0.05  |
| <b><i>nirS</i></b> |                         |                         |                         |                         |                           |         |        |
| ZI-ZN              | 1.75x10 <sup>5</sup> ab | 1.34x10 <sup>5</sup> a  | 2.18x10 <sup>5</sup> ab | 2.33x10 <sup>5</sup> b  | 2.47x10 <sup>5</sup> b    | 4.667   | <0.05  |
| SI-ZN              | 1.87x10 <sup>5</sup> ab | 1.43x10 <sup>5</sup> a  | 1.40x10 <sup>5</sup> a  | 2.12x10 <sup>5</sup> ab | 2.58x10 <sup>5</sup> b    | 8.793   | <0.05  |
| DI-ZN              | 1.50x10 <sup>5</sup>    | 2.83x10 <sup>5</sup>    | 2.18x10 <sup>5</sup>    | 2.36x10 <sup>5</sup>    | 2.19x10 <sup>5</sup>      | 2.303   | 0.130  |
| ZI-N               | 1.97x10 <sup>5</sup> ab | 2.23x10 <sup>5</sup> b  | 1.24x10 <sup>5</sup> a  | 1.71x10 <sup>5</sup> ab | 2.26x10 <sup>6</sup> ab   | 4.259   | <0.05  |
| SI-N               | 1.61x10 <sup>5</sup> a  | 2.56x10 <sup>5</sup> ab | 2.35x10 <sup>5</sup> ab | 2.25x10 <sup>5</sup> ab | 3.19x10 <sup>6</sup> b    | 5.233   | <0.05  |
| DI-N               | 1.92x10 <sup>5</sup>    | 2.33x10 <sup>5</sup>    | 1.72x10 <sup>5</sup>    | 1.92x10 <sup>5</sup>    | 2.43x10 <sup>5</sup>      | 3.403   | 0.053  |
| F                  | 2.60x10 <sup>5</sup> ab | 1.81x10 <sup>5</sup> a  | 1.87x10 <sup>5</sup> a  | 2.23x10 <sup>5</sup> a  | 3.32x10 <sup>6</sup> b    | 8.030   | <0.05  |
| F-ZC               | 2.49x10 <sup>5</sup> b  | 1.01x10 <sup>5</sup> a  | 1.69x10 <sup>5</sup> ab | 2.01x10 <sup>5</sup> ab | 1.93x10 <sup>5</sup> ab   | 3.408   | <0.05  |
| <b><i>nosZ</i></b> |                         |                         |                         |                         |                           |         |        |
| ZI-ZN              | 1.20x10 <sup>5</sup> a  | 1.94x10 <sup>5</sup> b  | 1.89x10 <sup>5</sup> b  | 1.07x10 <sup>5</sup> ab | 1.19x10 <sup>5</sup> ab   | 4.956   | <0.05  |
| SI-ZN              | 8.41x10 <sup>4</sup> a  | 6.38x10 <sup>4</sup> a  | 1.33x10 <sup>4</sup> b  | 8.46x10 <sup>4</sup> a  | 1.67x10 <sup>5</sup> b    | 13.263  | <0.05  |
| DI-ZN              | 2.66x10 <sup>5</sup> a  | 2.42x10 <sup>5</sup> a  | 1.47x10 <sup>5</sup> a  | 1.67x10 <sup>5</sup> b  | 1.20x10 <sup>5</sup> a    | 48.17   | <0.05  |
| ZI-N               | 1.63 x10 <sup>5</sup> a | 1.83x10 <sup>5</sup> a  | 9.19x10 <sup>4</sup> a  | 1.08x10 <sup>6</sup> b  | 1.30x10 <sup>5</sup> a    | 37.702  | <0.05  |
| SI-N               | 2.91 x10 <sup>5</sup> a | 2.07 x10 <sup>5</sup> a | 1.42x10 <sup>5</sup> a  | 1.61x10 <sup>6</sup> b  | 1.65x10 <sup>5</sup> a    | 41.078  | <0.05  |
| DI-N               | 4.53x10 <sup>5</sup> a  | 2.05x10 <sup>5</sup> a  | 1.18x10 <sup>5</sup> a  | 1.20x10 <sup>6</sup> b  | 1.66x10 <sup>5</sup> a    | 100.329 | <0.05  |
| F                  | 1.08x10 <sup>5</sup> a  | 8.15x10 <sup>5</sup> a  | 1.65x10 <sup>5</sup> a  | 1.03x10 <sup>6</sup> b  | 1.76x10 <sup>5</sup> a    | 49.16   | <0.05  |
| F-ZC               | 1.08x10 <sup>5</sup>    | 9.80x10 <sup>4</sup>    | 1.65x10 <sup>5</sup>    | 9.80x10 <sup>5</sup>    | 1.33x10 <sup>5</sup>      | 2.650   | 0.096  |



**Table S5: Pearson's correlations for the detection of time-independent relationships among the investigated gene copy numbers per gram soil and between the investigated genes and the main environmental factors for treatment ZI-ZN (zero irrigation without (zero) N application) of the ridge (0-10cm). *amoA* = gene encoding ammonium monooxygenase, *nxB* = gene encoding nitrite oxidoreductase, *narG* = gene encoding nitrate reductase, *nirK/nirS* = gene encoding nitrite reductase and *nosZ* = gene encoding nitrous oxide (N<sub>2</sub>O) reductase, N<sub>2</sub>O = nitrous oxide, WFPS = water filled pore space, Temp = soil temperature, NH<sub>4</sub><sup>+</sup> = ammonium, NO<sub>2</sub><sup>-</sup> = nitrite, NO<sub>3</sub><sup>-</sup> = nitrate. Values with \*, \*\*, \*\*\* indicate significance at  $p < 0.05, 0.01, 0.001$ .**

| <b>ZI-ZN</b>                 | <i>amoA</i> | <i>nxB</i> | <i>narG</i> | <i>nirK</i> | <i>nirS</i> | <i>nosZ</i> | N <sub>2</sub> O | WFPS  | Temp  | NH <sub>4</sub> <sup>+</sup> | NO <sub>2</sub> <sup>-</sup> | NO <sub>3</sub> <sup>-</sup> |
|------------------------------|-------------|------------|-------------|-------------|-------------|-------------|------------------|-------|-------|------------------------------|------------------------------|------------------------------|
| <i>amoA</i>                  | -           |            |             |             |             |             |                  |       |       |                              |                              |                              |
| <i>nxB</i>                   | -0.48       | -          |             |             |             |             |                  |       |       |                              |                              |                              |
| <i>narG</i>                  | 0.43        | 0.39       | -           |             |             |             |                  |       |       |                              |                              |                              |
| <i>nirK</i>                  | 0.57        | 0.28       | 0.46        | -           |             |             |                  |       |       |                              |                              |                              |
| <i>nirS</i>                  | 0.09        | -0.76      | -0.68       | -0.58       | -           |             |                  |       |       |                              |                              |                              |
| <i>nosZ</i>                  | -0.72       | 0.81       | 0.31        | -0.27       | -0.55       | -           |                  |       |       |                              |                              |                              |
| N <sub>2</sub> O             | -0.42       | -0.37      | -0.39       | -0.98       | 0.40        | 0.18        | -                |       |       |                              |                              |                              |
| WFPS                         | 0.11        | 0.27       | 0.76        | 0.22        | -0.74       | 0.39        | -0.22            | -     |       |                              |                              |                              |
| Temp                         | -0.55       | -0.16      | -0.94       | -0.51       | 0.65        | -0.09       | 0.44             | -0.86 | -     |                              |                              |                              |
| NH <sub>4</sub>              | 0.93        | -0.22      | 0.70        | 0.68        | -0.27       | -0.46       | -0.56            | 0.44  | -0.82 | -                            |                              |                              |
| NO <sub>2</sub> <sup>-</sup> | 0.02        | -0.78      | -0.33       | -0.59       | 0.49        | -0.33       | 0.61             | 0.13  | 0.08  | -0.08                        | -                            |                              |
| NO <sub>3</sub> <sup>-</sup> | 0.86        | -0.80      | 0.19        | 0.23        | 0.29        | -0.80       | -0.10            | 0.17  | -0.43 | 0.76                         | 0.52                         | -                            |

**Table S6: Pearson's correlations for the detection of time-independent relationships among the investigated gene copy numbers per gram soil and between the investigated genes and the main environmental factors for treatment SI-ZN (sprinkler irrigation without (zero) N application) of the ridge (0-10cm). *amoA* = gene encoding ammonium monooxygenase, *nxB* = gene encoding nitrite oxidoreductase, *narG* = gene encoding nitrate reductase, *nirK/nirS* = gene encoding nitrite reductase and *nosZ* = gene encoding nitrous oxide (N<sub>2</sub>O) reductase, N<sub>2</sub>O = nitrous oxide, WFPS = water filled pore space, Temp = soil temperature, NH<sub>4</sub><sup>+</sup> = ammonium, NO<sub>2</sub><sup>-</sup> = nitrite, NO<sub>3</sub><sup>-</sup> = nitrate. Values with \*, \*\*, \*\*\* indicate significance at  $p < 0.05, 0.01, 0.001$ .**

| SI-ZN                        | <i>amoA</i> | <i>nxB</i> | <i>narG</i> | <i>nirK</i> | <i>nirS</i> | <i>nosZ</i> | N <sub>2</sub> O | WFPS  | Temp  | NH <sub>4</sub> <sup>+</sup> | NO <sub>2</sub> <sup>-</sup> | NO <sub>3</sub> <sup>-</sup> |
|------------------------------|-------------|------------|-------------|-------------|-------------|-------------|------------------|-------|-------|------------------------------|------------------------------|------------------------------|
| <i>amoA</i>                  | -           |            |             |             |             |             |                  |       |       |                              |                              |                              |
| <i>nxB</i>                   | -0.58       | -          |             |             |             |             |                  |       |       |                              |                              |                              |
| <i>narG</i>                  | 0.59        | -0.36      | -           |             |             |             |                  |       |       |                              |                              |                              |
| <i>nirK</i>                  | -0.64       | 0.88       | -0.53       | -           |             |             |                  |       |       |                              |                              |                              |
| <i>nirS</i>                  | 0.04        | 0.56       | -0.10       | 0.16        | -           |             |                  |       |       |                              |                              |                              |
| <i>nosZ</i>                  | -0.22       | -0.02      | -0.19       | -0.35       | 0.52        | -           |                  |       |       |                              |                              |                              |
| N <sub>2</sub> O             | 0.32        | -0.84      | 0.41        | -0.57       | -0.90       | -0.37       | -                |       |       |                              |                              |                              |
| WFPS                         | 0.22        | -0.10      | 0.77        | -0.02       | -0.46       | -0.66       | 0.49             | -     |       |                              |                              |                              |
| Temp                         | -0.84       | 0.58       | -0.87       | 0.58        | 0.30        | 0.46        | -0.60            | -0.70 | -     |                              |                              |                              |
| NH <sub>4</sub>              | 0.79        | 0.03       | 0.37        | -0.08       | 0.42        | -0.36       | -0.21            | 0.16  | -0.56 | -                            |                              |                              |
| NO <sub>2</sub> <sup>-</sup> | -0.80       | 0.63       | -0.55       | 0.44        | 0.50        | 0.67        | -0.69            | -0.55 | 0.89  | -0.55                        | -                            |                              |
| NO <sub>3</sub> <sup>-</sup> | 0.97        | -0.41      | 0.60        | -0.59       | 0.29        | -0.09       | 0.10             | 0.15  | -0.75 | 0.86                         | -0.65                        | -                            |

**Table S7: Pearson's correlations for the detection of time-independent relationships among the investigated gene copy numbers per gram soil and between the investigated genes and the main environmental factors for treatment DI-ZN (drip irrigation without (zero) N application) of the ridge (0-10cm). *amoA* = gene encoding ammonium monooxygenase, *nxB* = gene encoding nitrite oxidoreductase, *narG* = gene encoding nitrate reductase, *nirK/nirS* = gene encoding nitrite reductase and *nosZ* = gene encoding nitrous oxide (N<sub>2</sub>O) reductase, N<sub>2</sub>O = nitrous oxide, WFPS = water filled pore space, Temp = soil temperature, NH<sub>4</sub><sup>+</sup> = ammonium, NO<sub>2</sub><sup>-</sup> = nitrite, NO<sub>3</sub><sup>-</sup> = nitrate. Values with \*, \*\*, \*\*\* indicate significance at  $p < 0.05, 0.01, 0.001$ .**

| DI-ZN                        | <i>amoA</i> | <i>nxB</i> | <i>narG</i> | <i>nirK</i> | <i>nirS</i> | <i>nosZ</i> | N <sub>2</sub> O | WFPS  | Temp  | NH <sub>4</sub> <sup>+</sup> | NO <sub>2</sub> <sup>-</sup> | NO <sub>3</sub> <sup>-</sup> |
|------------------------------|-------------|------------|-------------|-------------|-------------|-------------|------------------|-------|-------|------------------------------|------------------------------|------------------------------|
| <i>amoA</i>                  | -           |            |             |             |             |             |                  |       |       |                              |                              |                              |
| <i>nxB</i>                   | -0.24       | -          |             |             |             |             |                  |       |       |                              |                              |                              |
| <i>narG</i>                  | 0.56        | -0.04      | -           |             |             |             |                  |       |       |                              |                              |                              |
| <i>nirK</i>                  | -0.73       | 0.59       | -0.06       | -           |             |             |                  |       |       |                              |                              |                              |
| <i>nirS</i>                  | -0.20       | 0.47       | 0.55        | 0.79        | -           |             |                  |       |       |                              |                              |                              |
| <i>nosZ</i>                  | -0.39       | 0.83       | -0.15       | 0.41        | 0.15        | -           |                  |       |       |                              |                              |                              |
| N <sub>2</sub> O             | -0.23       | 0.61       | 0.40        | 0.44        | 0.48        | 0.80        | -                |       |       |                              |                              |                              |
| WFPS                         | -0.22       | -0.67      | 0.11        | -0.20       | -0.23       | -0.22       | 0.11             | -     |       |                              |                              |                              |
| Temp                         | -0.08       | 0.87       | 0.05        | 0.61        | 0.63        | 0.45        | 0.28             | -0.87 | -     |                              |                              |                              |
| NH <sub>4</sub>              | 0.31        | -0.47      | 0.81        | -0.18       | 0.26        | -0.30       | 0.31             | 0.67  | -0.49 | -                            |                              |                              |
| NO <sub>2</sub> <sup>-</sup> | -0.23       | -0.20      | -0.93       | -0.28       | -0.75       | -0.12       | -0.66            | -0.13 | -0.20 | -0.75                        | -                            |                              |
| NO <sub>3</sub> <sup>-</sup> | -0.40       | 0.28       | -0.61       | -0.09       | -0.55       | 0.70        | 0.31             | 0.12  | -0.16 | -0.42                        | 0.48                         | -                            |

**Table S8: Pearson's correlations for the detection of time-independent relationships among the investigated gene copy numbers per gram soil and between the investigated genes and the main environmental factors for treatment ZI-N (zero irrigation with N application) of the ridge (0-10cm). *amoA* = gene encoding ammonium monooxygenase, *nxrB* = gene encoding nitrite oxidoreductase, *narG* = gene encoding nitrate reductase, *nirK/nirS* = gene encoding nitrite reductase and *nosZ* = gene encoding nitrous oxide (N<sub>2</sub>O) reductase, N<sub>2</sub>O = nitrous oxide, WFPS = water filled pore space, Temp = soil temperature, NH<sub>4</sub><sup>+</sup> = ammonium, NO<sub>2</sub><sup>-</sup> = nitrite, NO<sub>3</sub><sup>-</sup> = nitrate. Values with \*, \*\*, \*\*\* indicate significance at  $p < 0.05, 0.01, 0.001$ .**

| ZI-N                         | <i>amoA</i> | <i>nxrB</i> | <i>narG</i> | <i>nirK</i> | <i>nirS</i> | <i>nosZ</i> | N <sub>2</sub> O | WFPS  | Temp | NH <sub>4</sub> <sup>+</sup> | NO <sub>2</sub> <sup>-</sup> | NO <sub>3</sub> <sup>-</sup> |
|------------------------------|-------------|-------------|-------------|-------------|-------------|-------------|------------------|-------|------|------------------------------|------------------------------|------------------------------|
| <i>amoA</i>                  | -           |             |             |             |             |             |                  |       |      |                              |                              |                              |
| <i>nxrB</i>                  | -0.45       | -           |             |             |             |             |                  |       |      |                              |                              |                              |
| <i>narG</i>                  | 0.12        | -0.92       | -           |             |             |             |                  |       |      |                              |                              |                              |
| <i>nirK</i>                  | -0.97       | 0.50        | -0.19       | -           |             |             |                  |       |      |                              |                              |                              |
| <i>nirS</i>                  | -0.89       | 0.53        | -0.21       | 0.96        | -           |             |                  |       |      |                              |                              |                              |
| <i>nosZ</i>                  | 0.05        | 0.34        | -0.24       | -0.21       | -0.16       | -           |                  |       |      |                              |                              |                              |
| N <sub>2</sub> O             | -0.29       | -0.53       | 0.81        | 0.25        | 0.32        | -0.10       | -                |       |      |                              |                              |                              |
| WFPS                         | -0.33       | -0.36       | 0.53        | 0.45        | 0.53        | -0.66       | 0.74             | -     |      |                              |                              |                              |
| Temp                         | -0.22       | 0.16        | -0.17       | 0.02        | -0.21       | 0.37        | -0.39            | -0.68 | -    |                              |                              |                              |
| NH <sub>4</sub>              | 0.44        | -0.84       | 0.67        | -0.56       | -0.71       | -0.22       | 0.13             | -0.09 | 0.36 | -                            |                              |                              |
| NO <sub>2</sub> <sup>-</sup> | -0.28       | 0.03        | -0.14       | 0.36        | 0.19        | -0.79       | -0.31            | 0.22  | 0.20 | 0.18                         | -                            |                              |
| NO <sub>3</sub> <sup>-</sup> | -0.04       | 0.21        | -0.36       | -0.09       | -0.32       | 0.13        | -0.68            | -0.72 | 0.91 | 0.35                         | 0.44                         | -                            |

**Table S9: Pearson's correlations for the detection of time-independent relationships among the investigated gene copy numbers per gram soil and between the investigated genes and the main environmental factors for treatment SI-N (sprinkler irrigation with N application) of the ridge (0-10cm). *amoA* = gene encoding ammonium monooxygenase, *nxB* = gene encoding nitrite oxidoreductase, *narG* = gene encoding nitrate reductase, *nirK/nirS* = gene encoding nitrite reductase and *nosZ* = gene encoding nitrous oxide (N<sub>2</sub>O) reductase, N<sub>2</sub>O = nitrous oxide, WFPS = water filled pore space, Temp = soil temperature, NH<sub>4</sub><sup>+</sup> = ammonium, NO<sub>2</sub><sup>-</sup> = nitrite, NO<sub>3</sub><sup>-</sup> = nitrate. Values with \*, \*\*, \*\*\* indicate significance at *p* < 0.05, 0.01, 0.001.**

| SI-N                         | <i>amoA</i> | <i>nxB</i> | <i>narG</i> | <i>nirK</i> | <i>nirS</i> | <i>nosZ</i> | N <sub>2</sub> O | WFPS  | Temp  | NH <sub>4</sub> <sup>+</sup> | NO <sub>2</sub> <sup>-</sup> | NO <sub>3</sub> <sup>-</sup> |
|------------------------------|-------------|------------|-------------|-------------|-------------|-------------|------------------|-------|-------|------------------------------|------------------------------|------------------------------|
| <i>amoA</i>                  | -           |            |             |             |             |             |                  |       |       |                              |                              |                              |
| <i>nxB</i>                   | 0.11        | -          |             |             |             |             |                  |       |       |                              |                              |                              |
| <i>narG</i>                  | 0.62        | -0.22      | -           |             |             |             |                  |       |       |                              |                              |                              |
| <i>nirK</i>                  | -0.41       | 0.62       | -0.06       | -           |             |             |                  |       |       |                              |                              |                              |
| <i>nirS</i>                  | -0.16       | 0.48       | -0.02       | 0.29        | -           |             |                  |       |       |                              |                              |                              |
| <i>nosZ</i>                  | -0.22       | 0.61       | -0.27       | 0.81        | -0.20       | -           |                  |       |       |                              |                              |                              |
| N <sub>2</sub> O             | 0.51        | -0.60      | 0.90        | -0.39       | -0.18       | -0.55       | -                |       |       |                              |                              |                              |
| WFPS                         | -0.49       | -0.89      | 0.03        | -0.22       | -0.45       | -0.27       | 0.36             | -     |       |                              |                              |                              |
| Temp                         | 0.16        | 0.83       | 0.21        | 0.64        | 0.75        | 0.33        | -0.17            | -0.75 | -     |                              |                              |                              |
| NH <sub>4</sub>              | 0.89        | -0.19      | 0.52        | -0.54       | -0.58       | -0.17       | 0.53             | -0.16 | -0.26 | -                            |                              |                              |
| NO <sub>2</sub> <sup>-</sup> | -0.02       | 0.90       | -0.48       | 0.36        | 0.62        | 0.33        | -0.74            | -0.85 | 0.68  | -0.34                        | -                            |                              |
| NO <sub>3</sub> <sup>-</sup> | 0.19        | 0.86       | -0.39       | 0.41        | 0.02        | 0.71        | -0.69            | -0.79 | 0.46  | 0.09                         | 0.76                         | -                            |

**Table S10: Pearson's correlations for the detection of time-independent relationships among the investigated gene copy numbers per gram soil and between the investigated genes and the main environmental factors for treatment DI-N (drip irrigation with N application) of the ridge (0-10cm). *amoA* = gene encoding ammonium monooxygenase, *nxB* = gene encoding nitrite oxidoreductase, *narG* = gene encoding nitrate reductase, *nirK/nirS* = gene encoding nitrite reductase and *nosZ* = gene encoding nitrous oxide (N<sub>2</sub>O) reductase, N<sub>2</sub>O = nitrous oxide, WFPS = water filled pore space, Temp = soil temperature, NH<sub>4</sub><sup>+</sup> = ammonium, NO<sub>2</sub><sup>-</sup> = nitrite, NO<sub>3</sub><sup>-</sup> = nitrate. Values with \*, \*\*, \*\*\* indicate significance at *p* < 0.05, 0.01, 0.001.**

| <b>DI-N</b>                  | <i>amoA</i> | <i>nxB</i> | <i>narG</i> | <i>nirK</i> | <i>nirS</i> | <i>nosZ</i> | N <sub>2</sub> O | WFPS  | Temp  | NH <sub>4</sub> <sup>+</sup> | NO <sub>2</sub> <sup>-</sup> | NO <sub>3</sub> <sup>-</sup> |
|------------------------------|-------------|------------|-------------|-------------|-------------|-------------|------------------|-------|-------|------------------------------|------------------------------|------------------------------|
| <i>amoA</i>                  | -           |            |             |             |             |             |                  |       |       |                              |                              |                              |
| <i>nxB</i>                   | -0.46       | -          |             |             |             |             |                  |       |       |                              |                              |                              |
| <i>narG</i>                  | 0.50        | -0.45      | -           |             |             |             |                  |       |       |                              |                              |                              |
| <i>nirK</i>                  | -0.66       | 0.28       | 0.25        | -           |             |             |                  |       |       |                              |                              |                              |
| <i>nirS</i>                  | -0.69       | 0.47       | -0.19       | 0.44        | -           |             |                  |       |       |                              |                              |                              |
| <i>nosZ</i>                  | -0.39       | 0.42       | -0.42       | 0.35        | -0.29       | -           |                  |       |       |                              |                              |                              |
| N <sub>2</sub> O             | 0.83        | -0.49      | 0.88        | -0.23       | -0.38       | -0.58       | -                |       |       |                              |                              |                              |
| WFPS                         | -0.37       | -0.60      | 0.19        | 0.33        | 0.32        | -0.35       | -0.06            | -     |       |                              |                              |                              |
| Temp                         | 0.07        | 0.83       | 0.00        | 0.09        | 0.18        | 0.18        | 0.07             | -0.82 | -     |                              |                              |                              |
| NH <sub>4</sub>              | -0.12       | -0.58      | -0.31       | -0.12       | -0.47       | 0.36        | -0.34            | 0.44  | -0.82 | -                            |                              |                              |
| NO <sub>2</sub> <sup>-</sup> | 0.22        | 0.73       | -0.02       | -0.16       | 0.21        | -0.08       | 0.17             | -0.81 | 0.95  | -0.87                        | -                            |                              |
| NO <sub>3</sub> <sup>-</sup> | 0.37        | 0.40       | 0.01        | -0.09       | -0.60       | 0.61        | 0.12             | -0.87 | 0.63  | -0.17                        | 0.50                         | -                            |

**Table S11: Pearson's correlations for the detection of time-independent relationships among the investigated gene copy numbers per gram soil and between the investigated genes and the main environmental factors for treatment F (fertigation) of the ridge (0-10cm). *amoA* = gene encoding ammonium monooxygenase, *nxB* = gene encoding nitrite oxidoreductase, *narG* = gene encoding nitrate reductase, *nirK/nirS* = gene encoding nitrite reductase and *nosZ* = gene encoding nitrous oxide (N<sub>2</sub>O) reductase, N<sub>2</sub>O = nitrous oxide, WFPS = water filled pore space, Temp = soil temperature, NH<sub>4</sub><sup>+</sup> = ammonium, NO<sub>2</sub><sup>-</sup> = nitrite, NO<sub>3</sub><sup>-</sup> = nitrate. Values with \*, \*\*, \*\*\* indicate significance at *p* < 0.05, 0.01, 0.001.**

| <b>F</b>                     | <i>amoA</i> | <i>nxB</i> | <i>narG</i> | <i>nirK</i> | <i>nirS</i> | <i>nosZ</i> | N <sub>2</sub> O | WFPS  | Temp  | NH <sub>4</sub> <sup>+</sup> | NO <sub>2</sub> <sup>-</sup> | NO <sub>3</sub> <sup>-</sup> |
|------------------------------|-------------|------------|-------------|-------------|-------------|-------------|------------------|-------|-------|------------------------------|------------------------------|------------------------------|
| <i>amoA</i>                  | -           |            |             |             |             |             |                  |       |       |                              |                              |                              |
| <i>nxB</i>                   | -0.78       | -          |             |             |             |             |                  |       |       |                              |                              |                              |
| <i>narG</i>                  | 0.81        | -0.73      | -           |             |             |             |                  |       |       |                              |                              |                              |
| <i>nirK</i>                  | -0.54       | 0.70       | -0.31       | -           |             |             |                  |       |       |                              |                              |                              |
| <i>nirS</i>                  | 0.29        | 0.19       | 0.12        | -0.29       | -           |             |                  |       |       |                              |                              |                              |
| <i>nosZ</i>                  | -0.07       | -0.06      | -0.19       | -0.73       | 0.50        | -           |                  |       |       |                              |                              |                              |
| N <sub>2</sub> O             | -0.17       | -0.16      | 0.33        | 0.44        | -0.73       | -0.58       | -                |       |       |                              |                              |                              |
| WFPS                         | 0.37        | -0.65      | 0.80        | -0.21       | -0.29       | -0.12       | 0.71             | -     |       |                              |                              |                              |
| Temp                         | -0.85       | 0.76       | -0.98       | 0.25        | 0.00        | 0.34        | -0.36            | -0.75 | -     |                              |                              |                              |
| NH <sub>4</sub>              | 0.64        | -0.72      | 0.85        | -0.04       | -0.38       | -0.57       | 0.64             | 0.79  | -0.92 | -                            |                              |                              |
| NO <sub>2</sub> <sup>-</sup> | -0.34       | 0.52       | -0.63       | -0.23       | 0.64        | 0.73        | -0.83            | -0.72 | 0.72  | -0.93                        | -                            |                              |
| NO <sub>3</sub> <sup>-</sup> | -0.20       | -0.03      | -0.64       | -0.34       | -0.26       | 0.32        | -0.46            | -0.57 | 0.56  | -0.48                        | 0.41                         | -                            |

**Table S12: Pearson's correlations for the detection of time-independent relationships among the investigated gene copy numbers per gram soil and between the investigated genes and the main environmental factors for treatment F-ZC (fertigation without (zero) crops) of the ridge (0-10cm). *amoA* = gene encoding ammonium monooxygenase, *nxrB* = gene encoding nitrite oxidoreductase, *narG* = gene encoding nitrate reductase, *nirK/nirS* = gene encoding nitrite reductase and *nosZ* = gene encoding nitrous oxide (N<sub>2</sub>O) reductase, N<sub>2</sub>O = nitrous oxide, WFPS = water filled pore space, Temp = soil temperature, NH<sub>4</sub><sup>+</sup> = ammonium, NO<sub>2</sub><sup>-</sup> = nitrite, NO<sub>3</sub><sup>-</sup> = nitrate. Values with \*, \*\*, \*\*\* indicate significance at *p* < 0.05, 0.01, 0.001.**

| <b>F-ZC</b>                  | <i>amoA</i> | <i>nxrB</i> | <i>narG</i> | <i>nirK</i> | <i>nirS</i> | <i>nosZ</i> | N <sub>2</sub> O | WFPS  | Temp  | NH <sub>4</sub> <sup>+</sup> | NO <sub>2</sub> <sup>-</sup> | NO <sub>3</sub> <sup>-</sup> |
|------------------------------|-------------|-------------|-------------|-------------|-------------|-------------|------------------|-------|-------|------------------------------|------------------------------|------------------------------|
| <i>amoA</i>                  | -           |             |             |             |             |             |                  |       |       |                              |                              |                              |
| <i>nxrB</i>                  | 0.90        | -           |             |             |             |             |                  |       |       |                              |                              |                              |
| <i>narG</i>                  | 0.84        | 0.86        | -           |             |             |             |                  |       |       |                              |                              |                              |
| <i>nirK</i>                  | 0.12        | 0.38        | 0.12        | -           |             |             |                  |       |       |                              |                              |                              |
| <i>nirS</i>                  | 0.84        | 0.55        | 0.46        | -0.07       | -           |             |                  |       |       |                              |                              |                              |
| <i>nosZ</i>                  | -0.15       | -0.33       | -0.21       | -0.95       | 0.02        | -           |                  |       |       |                              |                              |                              |
| N <sub>2</sub> O             | -0.09       | 0.12        | 0.21        | -0.41       | -0.44       | 0.52        | -                |       |       |                              |                              |                              |
| WFPS                         | 0.09        | 0.28        | 0.51        | -0.32       | -0.35       | 0.33        | 0.92             | -     |       |                              |                              |                              |
| Temp                         | -0.82       | -0.73       | -0.96       | 0.09        | -0.55       | 0.05        | -0.14            | -0.45 | -     |                              |                              |                              |
| NH <sub>4</sub>              | 0.92        | 0.84        | 0.71        | 0.44        | 0.81        | -0.48       | -0.41            | -0.21 | -0.67 | -                            |                              |                              |
| NO <sub>2</sub> <sup>-</sup> | -0.35       | -0.35       | -0.61       | -0.45       | -0.12       | 0.68        | 0.32             | -0.06 | 0.61  | -0.50                        | -                            |                              |
| NO <sub>3</sub> <sup>-</sup> | -0.62       | -0.77       | -0.80       | -0.66       | -0.22       | 0.74        | 0.10             | -0.21 | 0.67  | -0.72                        | 0.83                         | -                            |



**Table S13: Time dependent mixed effect model with `N<sub>2</sub>O fluxes` as response variable and `week` and `gene copy numbers per gram soil` and their interactions as explanatory variables. Model includes correction exponent due to the uneven time spacing between sampling dates. Correlation coefficients derived from two-way ANOVA for each gene for each treatment are shown. *amoA* = gene encoding ammonium monooxygenase, *nxB* = gene encoding nitrite oxidoreductase, *narG* = gene encoding nitrate reductase, *nirK/nirS* = gene encoding nitrite reductase and *nosZ* = gene encoding nitrous oxide (N<sub>2</sub>O) reductase. Values with \*, \*\*, \*\*\* indicate significance at  $p < 0.05, 0.01, 0.001$ .**

| Treatment   |             | ZI-ZN (zero irrigation without (zero) N application)      |            |             |             |             |             |              |             |             |             |             |  |
|-------------|-------------|-----------------------------------------------------------|------------|-------------|-------------|-------------|-------------|--------------|-------------|-------------|-------------|-------------|--|
| Gene        | <i>amoA</i> |                                                           | <i>nxB</i> |             | <i>narG</i> |             | <i>nirK</i> |              | <i>nirS</i> |             | <i>nosZ</i> |             |  |
|             | Chisq       | <i>p</i>                                                  | Chisq      | <i>p</i>    | Chisq       | <i>p</i>    | Chisq       | <i>p</i>     | Chisq       | <i>p</i>    | Chisq       | <i>p</i>    |  |
| Week        | 26.27       | 0.0009***                                                 | 41.58      | 1.6 e-06*** | 14.3        | 0.074       | 40.91       | 2.17 e-06*** | 39.48       | 4 -06***    | 43.52       | 6.99 e-7*** |  |
| Gene        | 0.144       | 0.995                                                     | 3.74       | 0.053       | 1.25        | 0.263       | 3.1         | 0.078        | 0.31        | 0.577       | 3.48        | 0.062       |  |
| Interaction | 3.99        | 0.858                                                     | 7.94       | 0.439       | 7.67        | 0.466       | 6.56        | 0.584        | 10.09       | 0.258       | 14.96       | 0.059       |  |
| Treatment   |             | SI-ZN (sprinkler irrigation without (zero) N application) |            |             |             |             |             |              |             |             |             |             |  |
| Gene        | <i>amoA</i> |                                                           | <i>nxB</i> |             | <i>narG</i> |             | <i>nirK</i> |              | <i>nirS</i> |             | <i>nosZ</i> |             |  |
|             | Chisq       | <i>p</i>                                                  | Chisq      | <i>p</i>    | Chisq       | <i>p</i>    | Chisq       | <i>p</i>     | Chisq       | <i>p</i>    | Chisq       | <i>p</i>    |  |
| Week        | 40.14       | 3.01 e-06***                                              | 34.56      | 3.21e-05*** | 34.72       | 3.0 e-05*** | 45.9        | 2.49 e-07*** | 22.14       | 0.005**     | 75.64       | 3.68e-13*** |  |
| Gene        | 0.05        | 0.800                                                     | 0.05       | 0.830       | 0.01        | 0.919       | 2.87        | 0.090        | 0.22        | 0.636       | 5.14        | 0.023*      |  |
| Interaction | 9.61        | 0.293                                                     | 8.2        | 0.414       | 7.94        | 0.540       | 8.0         | 0.433        | 6.58        | 0.583       | 18.20       | 0.019*      |  |
| Treatment   |             | DI-ZN (drip irrigation without (zero) N application)      |            |             |             |             |             |              |             |             |             |             |  |
| Gene        | <i>amoA</i> |                                                           | <i>nxB</i> |             | <i>narG</i> |             | <i>nirK</i> |              | <i>nirS</i> |             | <i>nosZ</i> |             |  |
|             | Chisq       | <i>p</i>                                                  | Chisq      | <i>p</i>    | Chisq       | <i>p</i>    | Chisq       | <i>p</i>     | Chisq       | <i>p</i>    | Chisq       | <i>p</i>    |  |
| Week        | 25.06       | 0.0015**                                                  | 124.68     | <2.2e-16*** | 43.15       | 8.22e-07*** | 64.1        | 7.28e-11***  | 36.3        | 1.55e-05*** | 68.85       | 8.3e-12***  |  |
| Gene        | 0.55        | 0.458                                                     | 0.001      | 0.921       | 0.0028      | 0.958       | 1.1         | 0.293        | 1.66        | 0.198       | 0.2         | 0.66        |  |
| Interaction | 2.15        | 0.976                                                     | 743.56     | 6.Z-07***   | 8.68        | 0.370       | 26.76       | 0.0008***    | 17.28       | 0.03*       | 32.74       | 6.86e-05*** |  |

**Table S13: continued.**

| Treatment   |             | <b>ZI-N (zero irrigation with N application)</b>      |             |                         |             |                         |             |                          |             |                         |             |                         |  |
|-------------|-------------|-------------------------------------------------------|-------------|-------------------------|-------------|-------------------------|-------------|--------------------------|-------------|-------------------------|-------------|-------------------------|--|
| Gene        | <i>amoA</i> |                                                       | <i>nxrB</i> |                         | <i>narG</i> |                         | <i>nirK</i> |                          | <i>nirS</i> |                         | <i>nosZ</i> |                         |  |
|             | Chisq       | <i>p</i>                                              | Chisq       | <i>p</i>                | Chisq       | <i>p</i>                | Chisq       | <i>p</i>                 | Chisq       | <i>p</i>                | Chisq       | <i>p</i>                |  |
| Week        | 40.14       | 3.01 e-06 <sup>***</sup>                              | 34.56       | 3.21e-05 <sup>***</sup> | 34.72       | 3.0 e-05 <sup>***</sup> | 45.9        | 2.49 e-07 <sup>***</sup> | 22.14       | 0.005 <sup>**</sup>     | 75.64       | 3.68e-13 <sup>***</sup> |  |
| Gene        | 0.05        | 0.800                                                 | 0.05        | 0.830                   | 0.01        | 0.919                   | 2.87        | 0.090                    | 0.22        | 0.636                   | 5.14        | 0.023 <sup>*</sup>      |  |
| Interaction | 9.61        | 0.293                                                 | 8.2         | 0.414                   | 7.94        | 0.540                   | 8.0         | 0.433                    | 6.58        | 0.583                   | 18.20       | 0.019 <sup>*</sup>      |  |
| Treatment   |             | <b>SI-N (sprinkler irrigation with N application)</b> |             |                         |             |                         |             |                          |             |                         |             |                         |  |
| Gene        | <i>amoA</i> |                                                       | <i>nxrB</i> |                         | <i>narG</i> |                         | <i>nirK</i> |                          | <i>nirS</i> |                         | <i>nosZ</i> |                         |  |
|             | Chisq       | <i>p</i>                                              | Chisq       | <i>p</i>                | Chisq       | <i>p</i>                | Chisq       | <i>p</i>                 | Chisq       | <i>p</i>                | Chisq       | <i>p</i>                |  |
| Week        | 25.06       | 0.0015 <sup>**</sup>                                  | 124.68      | <2.2e-16 <sup>***</sup> | 43.15       | 8.22e-07 <sup>***</sup> | 64.1        | 7.28e-11 <sup>***</sup>  | 36.3        | 1.55e-05 <sup>***</sup> | 68.85       | 8.3e-12 <sup>***</sup>  |  |
| Gene        | 0.55        | 0.458                                                 | 0.001       | 0.921                   | 0.0028      | 0.958                   | 1.1         | 0.293                    | 1.66        | 0.198                   | 0.2         | 0.66                    |  |
| Interaction | 2.15        | 0.976                                                 | 743.56      | 6.87e-07 <sup>***</sup> | 8.68        | 0.370                   | 26.76       | 0.0008 <sup>***</sup>    | 17.28       | 0.03 <sup>*</sup>       | 32.74       | 6.86e-05 <sup>***</sup> |  |
| Treatment   |             | <b>DI-N (drip irrigation with N application)</b>      |             |                         |             |                         |             |                          |             |                         |             |                         |  |
| Gene        | <i>amoA</i> |                                                       | <i>nxrB</i> |                         | <i>narG</i> |                         | <i>nirK</i> |                          | <i>nirS</i> |                         | <i>nosZ</i> |                         |  |
|             | Chisq       | <i>p</i>                                              | Chisq       | <i>p</i>                | Chisq       | <i>p</i>                | Chisq       | <i>p</i>                 | Chisq       | <i>p</i>                | Chisq       | <i>p</i>                |  |
| Week        | 26.27       | 0.0009 <sup>***</sup>                                 | 41.58       | 1.6 e-06 <sup>***</sup> | 14.3        | 0.074                   | 40.91       | 2.17 e-06 <sup>***</sup> | 39.48       | 4 -06 <sup>***</sup>    | 43.52       | 6.99 e-7 <sup>***</sup> |  |
| Gene        | 0.144       | 0.995                                                 | 3.74        | 0.053                   | 1.25        | 0.263                   | 3.1         | 0.078                    | 0.31        | 0.577                   | 3.48        | 0.062                   |  |
| Interaction | 3.99        | 0.858                                                 | 7.94        | 0.439                   | 7.67        | 0.466                   | 6.56        | 0.584                    | 10.09       | 0.258                   | 14.96       | 0.059                   |  |

**Table S13: continued.**

| Treatment   |             | F (fertigation) |            |             |             |          |             |              |             |          |             |             |  |
|-------------|-------------|-----------------|------------|-------------|-------------|----------|-------------|--------------|-------------|----------|-------------|-------------|--|
| Gene        | <i>amoA</i> |                 | <i>nxB</i> |             | <i>narG</i> |          | <i>nirK</i> |              | <i>nirS</i> |          | <i>nosZ</i> |             |  |
|             | Chisq       | <i>p</i>        | Chisq      | <i>p</i>    | Chisq       | <i>p</i> | Chisq       | <i>p</i>     | Chisq       | <i>p</i> | Chisq       | <i>p</i>    |  |
| Week        | 26.27       | 0.0009***       | 41.58      | 1.6 e-06*** | 14.3        | 0.074    | 40.91       | 2.17 e-06*** | 39.48       | 4 -06*** | 43.52       | 6.99 e-7*** |  |
| Gene        | 0.144       | 0.995           | 3.74       | 0.053       | 1.25        | 0.263    | 3.1         | 0.078        | 0.31        | 0.577    | 3.48        | 0.062       |  |
| Interaction | 3.99        | 0.858           | 7.94       | 0.439       | 7.67        | 0.466    | 6.56        | 0.584        | 10.09       | 0.258    | 14.96       | 0.059       |  |

  

| Treatment   |             | F-ZC (fertigation without (zero) crops) |            |             |             |             |             |              |             |          |             |             |  |
|-------------|-------------|-----------------------------------------|------------|-------------|-------------|-------------|-------------|--------------|-------------|----------|-------------|-------------|--|
| Gene        | <i>amoA</i> |                                         | <i>nxB</i> |             | <i>narG</i> |             | <i>nirK</i> |              | <i>nirS</i> |          | <i>nosZ</i> |             |  |
|             | Chisq       | <i>p</i>                                | Chisq      | <i>p</i>    | Chisq       | <i>p</i>    | Chisq       | <i>p</i>     | Chisq       | <i>p</i> | Chisq       | <i>p</i>    |  |
| Week        | 40.14       | 3.01 e-06***                            | 34.56      | 3.21e-05*** | 34.72       | 3.0 e-05*** | 45.9        | 2.49 e-07*** | 22.14       | 0.005**  | 75.64       | 3.68e-13*** |  |
| Gene        | 0.05        | 0.800                                   | 0.05       | 0.830       | 0.01        | 0.919       | 2.87        | 0.090        | 0.22        | 0.636    | 5.14        | 0.023*      |  |
| Interaction | 9.61        | 0.293                                   | 8.2        | 0.414       | 7.94        | 0.540       | 8.0         | 0.433        | 6.58        | 0.583    | 18.20       | 0.019*      |  |

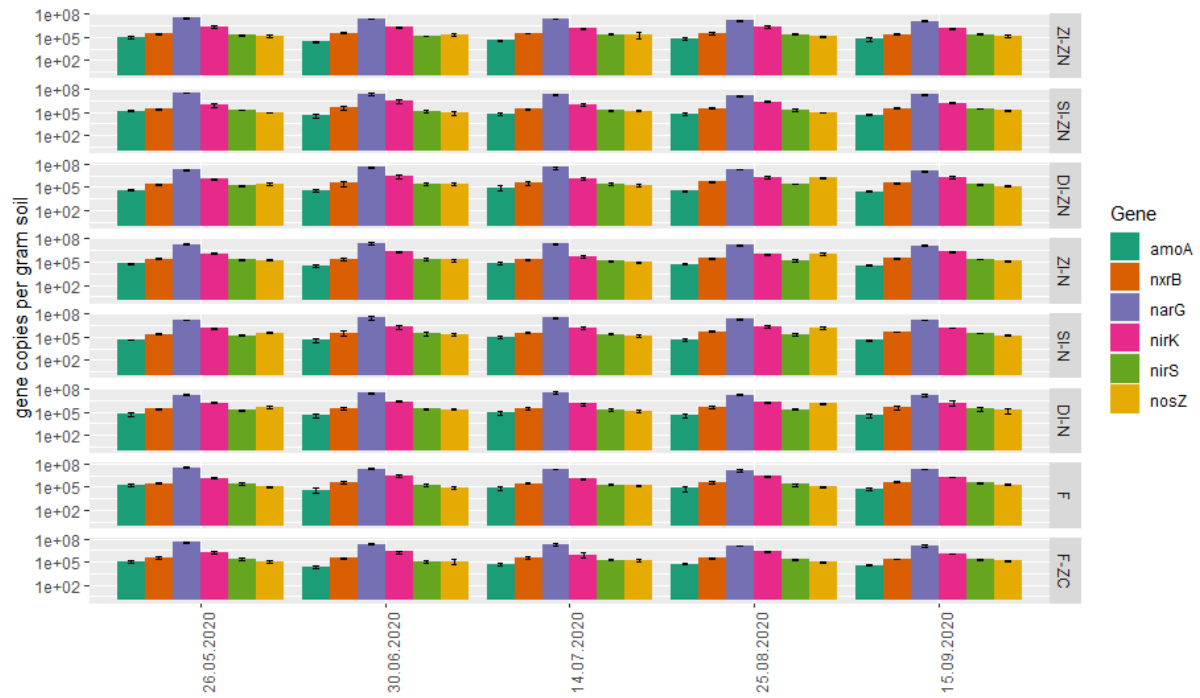

Figure S1: Determined quantities of log transformed gene copy numbers per gram soil with standard deviation of *amoA* (gene encoding ammonium monooxygenase, green), *nxrB* (gene encoding nitrite oxidoreductase, orange), *narG* (gene encoding nitrate reductase, purple), *nirK* (gene encoding nitrite reductase, pink), *nirS* (gene encoding nitrite reductase, light green), *nosZ* (gene encoding N<sub>2</sub>O reductase, yellow) for each treatment: ZI-ZN (no (zero) irrigation without (zero) nitrogen (N) fertilizer), ZI-N (no (zero) irrigation with broadcasted N fertilizer), SI-ZN (sprinkler irrigation without (zero) N fertilizer), SI-N (sprinkler irrigation with broadcasted N fertilizer), DI-ZN (drip irrigation without (zero) N fertilizer), DI-N (drip irrigation with broadcasted N fertilizer), F (fertigation), F-ZC (fertigation without (zero) crops), over the cropping season 2020 (n = 162 per treatment and gene).

5
